# Supplementary material for: Does advancement in marker-less pose-estimation mean more quality research? A systematic review
Source: Front Behav Neurosci. 2025 Aug 22;19:1663089. doi: 10.3389/fnbeh.2025.1663089 (PMC12411509; doi:10.3389/fnbeh.2025.1663089)
Supplement: Supplementary file 2 [file Table_1.xlsx]

## Sheet: Sheet1
Article Information						Methodology Information														Performance
Name of tool	Year	Title	Journal	Github Link	Main Purpose	Main Interest	Tools Involved	Comparative Test	Camera	Resolution	FPS	System Config	Architecture	Backbone	Animal	Keypoint	Training Dataset Size	Training Iterations	Parameter of Interest	Keypoint Detection Accuracy	Behavior Recognization Accuracy	Comparitive Test Result
DeepLabCut	2018	DeepLabCut: markerless pose estimation of user-defined body parts with deep learning	Nature Neuroscience	https://github.com/DeepLabCut/DeepLabCut	Core Pose-Estimation	Transfer learning based keypoint detection and tracking	1. DeepLabCut 2. TensorFlow	Against Human Rater	Point Grey Firefly Point Grey Grasshopper	640x480 800x800 2048x1088	30hz 100-320hz	1. NVIDIA GTX Ti GPU	DeepLabCut	ResNet-50 ResNet-101 ResNet-101 with intermediate supervision	C57BL/6J	mouse total: 4 snout. ears, tail base digits: 13 3/digit + wrist	1080 frames (80/20) (train/test) Digit: 141 frames	500,000 steps	1. RMSE b/w predicted & labeled 2. Cross-entropy loss 3. Vs varriability comparission	Mouse trail: 1. ResNet-50: 3.09 ± 0.04 px 2. ResNet-101: 2.90 ± 0.009 px 3. ResNet-101ws: 2.88 ± 0.06 px 4. Human Varraiblity: 2.69 ± 0.10 px	Did not performed test	Against Human: RMSE almost same with the model
LEAP	2018	Fast animal pose estimation using deep neural networks	Nature Methods	https://github.com/talmo/leap	Core Pose-Estimation	Accurate; Fast pose estimation from few labels	1. LEAP	Against Human Rater	Point Grey Blackfly S	2048x1088	170 fps	1. Intel i7-5960X 2. 128 GB RAM 3. NVIDIA GTX 1080 Ti 4. NVIDIA P100 GPU	LEAP transposed convolution layer	ResNet-50 CNN	C57BL/6	Total: 16 3/limb (ankle,knee, hip); snout, neck, tail base, tail tip	10000 frames	50	1. Keypoint error percentage	Median test RMSE (all 16 mouse keypoints): 2.9 px (≈1.5 mm) on held‐out test set (242 frames). Interquartile range: 2.3–3.4 px across keypoints	Did not performed test	95 % of mouse keypoints fell within 3 px of human annotation 79 % of frames had all keypoints within 2.5 px error after training on just 50 frames
DeepPoseKit	2019	DeepPoseKit, a software toolkit for fast and robust animal pose estimation using deep learning	eLife	https://github.com/jgraving/deepposekit	Core Pose-Estimation	Fast, robust keypoint estimation	1. DeepPoseKit	Against DeepLabCut	*Not Mentioned*	640x480	*Not Mentioned*	*Not Mentioned*	Stacked DenseNet	CNN	C57BL/6J	Total: 4 snout. ears, tail base	116 frames	1 000 000 steps	1. Prediction accuracy	Nearly identical mean error vs original DeepLabCut (no significant change)	Did not performed test	No loss in accuracy; inference speed matches original DeepLabCut
SimBa	2020	Simple Behavioral Analysis (SimBA): an open source toolkit for computer classification of complex social behaviors in experimental animals	Nature Neuroscience	https://github.com/sgoldedlab/simba	Behavior Classification	Low-barrier, end-to-end workflow (video → pose → RF classifier → visuals) that can out-perform human observers and runs on a standard Windows PC	1. DeepLabCut / DeepPoseKit 2. Feature extractor 3. Random Forest 4. Tkinter GUI	Against Human Rater	Basler acA2040 Logitech C922	1000x2056 1280x720 640x480	25-80 30hz	1. i9 CPU 2. 32 GB RAM 3. NVIDIA RTX 2080 Ti GPU	DeepLabCut DeepPoseKit Random Forest	ResNet50 CNN Random Forest (2000 tree)	C57BL/6J wt and CD-1 Long Evans Rat Sprague Dawley Rat CRIM13 Mice	Total: 16 nose, ears L/R, neck, back1/2, tail-base/mid/tip, fore/hind paws	Mouse RI: 103 k–472 k annotated frames; Rat RI: 136 k; CRIM13: 757 k (across 64 videos).	*not specified*	1. Precision, 2. recall, 3. F1; 4. Learning-curve F1 vs annotation count; 5. Run-time	Mean DLC Euclidean error ≈ 1 mm (most parts); tail-end 4–5 mm	Mouse RI F1 0.78 – 0.98; Rat RI F1 0.92 – 0.99; CRIM13 F1 0.74 – 0.96	Against expert labels: Mouse RI F1 up to 0.983; Rat RI up to 0.985; CRIM13 up to 0.957. No head-to-head with other toolkits reported.
Anipose	2021	Anipose: A toolkit for robust markerless 3D pose estimation	Cell Reports	https://github.com/lambdaloop/anipose	3D Pose-Estimation	Open-source Python toolkit that extends DeepLabCut for camera calibration, trajectory filtering, triangulation and visualization to robustly track animal poses in 3D	1. DeepLabCut	*Not Mentioned*	Sentech STC-MBS241U3V	1024x768	200hz	*Not Mentioned*	DeepLabCut	ResNet50	C57BL/6	6 hand points: dorsal wrist; base of digit 5; proximal end of digit 3	2 200 frames	*not specified*	1. 3D joint‐position and angle reconstruction error; 2. reprojection error threshold (10 px)	90% of frames <18 px error (~1.6 mm); 75% <12 px error	Did not performed test	3D tracking error <18 px in 90% of frames; <12 px in 75% of frames (mouse dataset)
CAPTURE	2021	Continuous Whole-Body 3D Kinematic Recordings across the Rodent Behavioral Repertoire	Neuron	https://github.com/JesseDMarshall/CAPTURE_demo	3D Pose-Estimation	High-precision continuous tracking of pose across days; quantitative analysis of behavioral, sequences, states; phenotyping drug and disease effects	1. CAPTURE 2. Motion Mapper 3. TCN Imputations 4. Behavior Analysis Suite 5. MATLAB	Against DeepLabCut	Kestreal 4200 Flea3 FL3-U3-13S2C	1320x1048	300hz to 30hz	1. 4X NVIDIA V100	Temporal/Spectral Filtering TCN imputation t-SNE Watershed Clustering	Marker triangulation TCN t-SNE Watershed Clustering	Long-Evans Rat WT & Fmr1-KO	Total: 20 nose, ears, shoulders, neck, elbows, all paws hips, knee, ribs, center, tail base	100,000 frames	100,000 epochs	1. Motion capture reprojection error 2. Unsupervised cluster	Median positional error: 0.21 ± 0.07 mm	Spectral peaks at behavior freq: Grooming: 4-9hz scratching: 7-12hz shaking: 14hz Confidence: >90%	3D position error: DeepLabCut: 10-30 mm error CAPTURE: 0.21 ± 0.07 mm
DANNCE	2021	Geometric deep learning enables 3D kinematic profiling across species and environments	Nature Methods	https://github.com/spoonsso/dannce	3D Pose-Estimation	Robust multi-view tracking of anatomical landmarks across freely moving rodents using projective geometry	1. DANNCE 2. Projective-geometry input module	Against DeepLabCut	Blackfly S USB-3 (FLIR), Sony IMX428-mono	Side-views: 2816×1408; Top-views: 2816×1696	60hz	*Not Mentioned*	3D CNN Projective Geometry	3D CNN Projective Geometry	C57BL/6J odor-trail and naturalistic behavior datasets	Total: 12~ head, trunk, and limbs	7000000 frames	*not specified*	3D landmark prediction error	DANNCE: 3.9 ± 6.2 mm DLC: 17.6 ± 23.0 mm	Did not performed test	≈ 5-fold lower error and ≈ 2-fold higher accuracy than DeepLabCut PMC
DeepLabStream	2021	DeepLabStream enables closed-loop behavioral experiments using deep learning-based markerless, real-time posture detection	Communication Biology	https://github.com/SchwarzNeuroconLab/DeepLabStream	Real-Time Tracking	Real-time pose detect for closed loop tast	1. DeepLabCut 2. Additional modules	Against DeepLabCut	Intel RealSense Camera D453 Basler acA1300	848x480	30hz 60hz	System 1: 1. Intel i7-9700K 2. 64 GB RAM 3. NVIDIA RTX 2080 Ti System 2: 1. Intel i7-7700K 2. 32 GB RAM 3. NVIDIA GTX 1050	DeepLabCut	ResNet-50 ResNet-101 MobileNet V2	C57BL/6J	Total: 3 nose, neck, tail base	300 frames (Train: 95% & Test: 5%)	500,000 iterations	1. Pose estimation error 2. False positive/negative rate 3. Frame-processing latency	mean tracking error 1. nose: 3.3 ± 4.4 px 2. neck: 4 ± 12 px 3. tail base: 3.3 ± 2 px	For head direction: False-positive rate: 11.6-11.8% False-negative rate: 11.1 ± 4.1 %	Processing Latency: ResNet-50 (30 Hz): i7-9700K: 30 ± 7 ms/frame i7-7700K: 91 ± 10 ms/frame MobileNet v2 @ 320×256: 7.7 – 9.4 ms/frame (~130 Hz) ResNet-50 @ 320×256: ~10 ms/frame (@94 Hz)
OptiFlex	2021	OptiFlex: Multi-Frame Animal Pose Estimation Combining Deep Learning With Optical Flow	Frontiers in Cellular Neuroscience	https://github.com/saptera/OptiFlex	Core Pose-Estimation	reduces label count, tackles occlusion, reports intuitive aPCK scores	1. FlexibleBaseline 2. OpticalFlow 3. Keras/TensorFlow	Against DeepLabCut, LEAP, DeepPoseKit	*Not Mentioned*	*Not Mentioned*	*Not Mentioned*	1. Google-Cloud VM (N1-24 vCPU) 2. 156 GB RAM 3. 2 x NVIDIA TESLA V100 GPU	FlixibleBaseline OpticalFlow	ResNet50	C57BL/6	total: 8 front/hind paws (L & R), snout, tail (three segments)	300-600 frames	Base model: 50 epochs OpticalFlow: 30 epochs	1. Adjusted PCK per keypoint 2. Miss-rate 3. Speed (ms/frame)	Mean aPCK error mouse 0.0957	Did not performed test	OpticalFlow drops side-view mean error 0.122 → 0.096 (p < 0.01); FlexibleBaseline beats DeepLabCut by 20.9 % (0.131↘0.104) and LEAP/DenseNet by > 50 %
MARS	2021	The Mouse Action Recognition System (MARS) software pipeline for automated analysis of social behaviors in mice	eLife	https://github.com/neuroethology/MARS	Behavior Classification	Pre-trained, human-level social-behaviour scorer that is robust to head-mounted cables and runs “out-of-the-box”; can be fine-tuned on custom arenas/behaviours via MARS_Developer	1. MSC-MultiBox detector 2. 8-stack Hourglass pose network 3. XGBoost binary classifiers + HMM smoothing 4. BENTO GUI	Against Human Rater	Point Grey Grasshopper3	1024x570 1280x500	30 fps	1. 8 core Intel Xeon CPU 2. 24 GB RAM 3. NVIDIA TITAN XP 12 GB GPU	MARS	ResNet-v2 8-Stack Hourglass Pose CNN	C57BL/6J	Top-view: 9 landmarks (nose, ears L/R, neck, hips L/R, tail base/mid/tip). Front-view: 13 landmarks (adds paws & extra tail points)	15 000 frames (each annotated by 5 humans) for detection+pose; 6.95 h of behaviour video for classifier training (+ 3.85 h val, 3.37 h test)	*Not specified* based on the XGBoost until validation loss platue	1. Pose: PCK at 5 mm, OKS mAP / mAR; 2. Behaviour: precision, recall, PR-AUC; inter-annotator F1 variance	Top-view: 92 % of keypoints within 5 mm; mAP 0.902, mAR 0.924; AP@50 = 0.99, AP@75 = 0.957	On 1.7 h test-set-1, mean precision/recall vs single expert ≈ 0.85/0.83 for attack, 0.80/0.79 for mount, 0.84/0.82 for close investigation	Pose: human-normalised OKS mAP 0.902 vs median human upper-limit. Behaviour: MARS F1 essentially overlapped human range across all three actions; precision-recall curves sit on annotator cloud
MouseVenue3D	2021	MouseVenue3D: A Markerless Three-Dimension Behavioral Tracking System for Matching Two-Photon Brain Imaging in Free-Moving Mice	Neuroscience Bulletin (Neurosci. Bull.)	*Not Mentioned*	3D Pose-Estimation	3-D markerless mouse behavior tracking integrated with high-resolution two-photon neural recording	1. DeepLabCut 2. MATLAB 3. Pose3d toolbox for 3-D reconstruction	Comparison of 3-D vs 2-D data BiLSTM behavior-recognition accuracy	Four USB 3.0 color cameras	1280 × 720 pixels	46 fps	Workstation: Intel i9-10900k CPU; NVIDIA GeForce RTX 2080Ti GPU; 128 GB RAM; 12 TB HDD; MATLAB 2020a; Python 3.7	Automated multi-view calibration module + 3-D reconstruction pipeline (DeepLabCut → pose3d)	DeepLabCut’s ResNet-based network	C57BL/6J mice	16	~400 min of video from 4 cameras (≈1.1 M frames per camera)	pre-trained DeepLabCut model used	1. UMAP silhouette coefficient; 2. BiLSTM behavior-recognition accuracy	Did not performed test	~30 % higher classification accuracy for 3-D vs 2-D BiLSTM mod	3-D data yielded significantly higher silhouette scores (p < 0.0001) and behavior-recognition accuracy compared to 2-D
BehaviorDEPOT	2022	BehaviorDEPOT is a simple, flexible tool for automated behavioral detection based on markerless pose tracking	eLife	https://github.com/DeNardoLab/BehviorDEPOT	Behavior Classification	Heuristic detection of freezing, jumping, rearing, escape, locomotion, novel-object exploration; modular GUI enabling heuristic development, validation, and spatial-temporal analyses.	1. DeepLabCut 2. MATLAB 3. Arduino-controlled Experiment Module	Against Human Raters Against JAABA classifier	Chameleon3 USB Standard WebCAM	1024x768	50 fps 30 fps	Training Station: 1. Intel Core i9-9900K processor 2. 32 GB RAM 3. NVIDIA GeForece RTX 2070 Super 8 GB GPU Analyzing Video Station: 1. AMD RYZEN 9 3850X 2. 16 GB RAM 3. Gigabyte GeForce RTX 2060 Super 6 GB GPU	DeepLabCut Custom metrics extractor	ResNet	C57/BI6	Total: 8 Nose, Ears, center, hips, tail base	DLC: 400 frames Classifier 27,000 frames	DLC: 1-1.65 million iterations	1. Freezing Heuristic	mean tracking error 0.74-2.76px Error	Freezing (50 fps): Precision 0.86, Recall 0.92, F1 0.89, Specificity 0.97 Freezing (30 fps webcam): Precision 0.98, Recall 0.88, F1 0.93, Specificity 0.99	Against Human Mice: Precision = 0.98; Recall = 0.92; F1 = 0.95; Specificity = 0.95; human comparison P = 0.49 (Mann–Whitney U) Against JAABA: • Precision: F(1,12)=0.58, P=0.46 (n.s.) • Recall: F(1,11)=51.27, P<0.001 • F1: F(1,11)=51.27, P<0.001; N=4–6 videos; two‐way ANOVA with Sidak post-hoc tests
DeepLabCut	2022	Multi-animal pose estimation, identification and tracking with DeepLabCut	Nature Methods	https://github.com/DeepLabCut/DeepLabCut	Multi-Animal Tracking	New DLCRNet architectures with score-map + location-refinement + PAF + ID heads Data-driven skeleton pruning for assembly	1. DeepLabCut	Against mAP	Point Grey Firefly Microsoft LifeCam	640×480 1280x720	30hz	*Not Mentioned*	DeepLabCut ImageNet	ResNet50 EfficientNet	C57BL/6J	Total 8 snout/tailbase (2) + leftear/rightear (4) + shoulder/spine1/spine2/spine3 (8)	Labelled frame: 161 adult mouse Labelled frame: 542 pup each 70/30 train/test split	60,000-200,000	1. Pixel RMSE, 2. mAP, 3. MOTA 4. ID accuracy.	Median test RMSE (pixels): 2.65 tri-mouse ; 5.25 pups	Did not performed test	DLCRNet_ms5 mAP exceeds HRNet-AE/ResNet-AE on all datasets (ANOVA P < 10⁻⁷) Tracking ellipse vs box: MOTA 0.97 vs 0.78, idtracker.ai fails: negative MOTA vs DLCRNet positive (tri-mouse)
SLEAP	2022	SLEAP: A deep learning system for multi-animal pose tracking	Nature Methods	https://github.com/talmolab/sleap	Multi-Animal Tracking	One toolkit handles any species (flies → gerbils), lets users compare 30+ backbones & two grouping strategies, reaches real-time (≤ 3 ms) inference and 800 FPS without down-sampling	1 SLEAP	Against DeepLabCut; DeepPoseKit; LEAP	Blackfly Mono S Camera	1280x1024	40 fps	1. NVIDIA RTX 2080 Ti or 2. NVIDIA RTX 3090	SLEAP	CNN Unet EfficientNet-B7 MobileNetV1 SEResNet-101	Mice *Not Specified*	Total 5 snout ears tail base, tail tip Total 11 nose neck ears all paws tail base tail mid tail tip	mice home cage: 1474 frames (2948 instances) 1178 train/148 val/148 test mice open field: 1000 frames (2950 instances) 800 train/100 val/100 test	Converged to 90 % max mAP in < 5 min (<6 000 iters); full training ≤ 2 h.	1. mAP, 2. 95 % landmark error (mm & % body), 3. FPS/latency, 4. sample-efficiency (# labels for 50 % & 90 % mAP).	mice home cage top-down mAP 0.715, 95 % error ≤ 3.8 mm (4.0 % body). Mice open field top-down mAP 0.774, 95 % error 3.04 mm (3.7 % body).	Did not performed test	SLEAP top-down vs SLEAP bottom-up (mouse datasets) mice_hc: mAP 0.715 vs 0.651; speed 358 FPS vs 179 FPS mice_of: mAP 0.774 vs 0.731; speed 358 FPS vs 180 FPS SLEAP vs DeepLabCut (same open-field mice dataset) mAP 0.774 vs 0.733 (Δ +0.041). Inference ~360 FPS vs ~31 FPS (Δ ×11.6 faster).
AlphaTracker	2023	AlphaTracker: a multi-animal tracking and behavioral analysis tool	Frontiers in Behavioral Neuroscience	https://github.com/MVIG-SJTU/AlphaTracker	Multi-Animal Tracking	1. Individual behaviors: walking, digging, sniffing, rearing, turning, face grooming, and body grooming 2. Social behaviors: following, chasing, anogenital sniffing, face sniffing, and social rearing	1. YOLOv3 2. SENet 3. Kalman Filtering 4. Agglomerative hierarchical clustering algorithm	Against DeepLabCut, SLEAP	Logitech C930e	1920x1080	*Not Mentioned*	1. 72 Intel® Xeno® Gold 6150 CPU 2. 2080-Ti GPU 3. 393 GB RAM	YOLOv3 SENet Hierachical (WARD) DBSCAN	DarkNet-53 ResNet	C57BL/6J 2 or 4	Total: 4 snout, ear X 2, tail base	Training: 600 frames Testing: 200 frames	100000	1. Keypoint detection accuracy (mAP) 2. Tracking consistency (MOTA and MOTP) 3. Clustering method accuracy (Adjusted Rand Index)	YOLOv3 + SENet Detection: mAP: 2 mice: 87.2%; 4 mice: 85.6% Kalman Tracking: MOTA: 2 mice: 82.2%; 4 mice: 84.0% MOTA: 2 mice: 86.2%; 4 mice: 87.2%	Adjusted Rand Index Large Dataset: 0.201186 Small Dataset: 0.186533 Random Dataset: 0.003451	(MOTA; MOTP; mAP) 2 Mice AlphaTracker: 82.2; 86.2; 87.2 DeepLabCut: 40.6; 77.6; 14.1 SLEAP: 73.6; 76.7; 26.8 4 Mice AlphaTracker: 84.0; 87.2; 85.6 DeepLabCut: 71.4; 86.5; 68.0 SLEAP: 77.9; 86.5; 83.9
DeepOF	2023	Automatically annotated motion tracking identifies a distinct social behavioral profile following chronic social defeat stress	Nature Communications	https://github.com/mlfpm/deepof	Behavior Classification	Total of 11 predefined behavior to detect Detect motion motif in social interaction, open field, and social avoidance	1. DeepLabCut 2. Savitzky-Golay filter 3. XGBoost 4. SHAP 5. CatBoost 6. SMOTE	*Not Mentioned*	*Not Mentioned*	*Not Mentioned*	*Not Mentioned*	*Not Mentioned*	DeepLabCut Kleinberg merging CNN+2 GRU layer spatial CensNet XGBoost	ResNet CensNet XGBoost	C57BL/6N	Total: 11 nose, ears, 3 on spine, 4 paw, tail base	567,367 frames	Supervised: Until 8.48% positively labeled. Unsupervised: 150 Epochs	Supervised 1. Behavior Duration Unsupervised 1. cluster-time proportions 2. Wasserstein distance over time	Did not performed test	Behavior classifier: 1. Train balanced accuracy: 0.78 ± 0.005 2. Internal validation: 0.75 ± 0.046 3. External validation: 0.75 ± 0.04 PC1 separation: Social Interaction classifier T: 8.28 Social Avoidance classifier T: -2.84	Did not performed test
ContrastivePose	2023	ContrastivePose: A contrastive learning approach for self-supervised feature engineering for pose estimation and behavorial classification of interacting animals	Computers in Biology and Medicine	https://github.com/Zhoutianxun/ContrastivePose	Infrasturcture/Framework Behavior Classification	Leverage unlabeled pose data via contrastive learning for pose estimation; behavior detect out of 6 sniffing (nose to nose; anogenital; body); affilitative; following; exploration	1. YOLOv3 2. Random Forest	Against Human Rater	*Not Mentioned*	*Not Mentioned*	30 fps	1. NVIDIA RTX3060 GPU	YOLOv3 Random Forest Model	YOLOv3 algorithm	2x Mice *Not Specified*	CalMS21: Total: 7 nose, ears, neck, hips, tail base In-house: 4 bounding box	CalMS21 dataset In-house dataset Training: 2.5% of 400,000	*Not Specified* 21 min on 360k frames	Macro-averaged metrics: 1. Precision; 2. recall; 3. F-1 score; 4. Matthews Correlation Coefficient (MCC); 5. Accuracy	Did not performed test	Precision; recall; F-1 score; MCC; Accuracy CalMS21 (5 Class): 0.80 ± 0.012; 0.72 ± 0.005; 0.73 ± 0.007; 0.79 ± 0.006; 0.87 ± 0.004 In-house (9 Class): 0.29 ± 0.009; 0.39 ± 0.012; 0.31 ± 0.011; 0.49 ± 0.017; 0.71 ± 0.029	Against human CalMS21 F1 +0.04 vs. best manual (0.73 vs. 0.69); In-house F1 +0.07 (0.31 vs. 0.24) Without pre-training: CalMS21 F1 +0.04 (0.73 vs. 0.69), In-house F1 +0.02 (0.31 vs. 0.29)
SaLSa	2023	SaLSa: A Combinatory Approach of Semi-Automatic Labeling and Long Short-Term Memory to Classify Behavioral Syllables	eNeuro	https://github.com/Sakata-Lab/SaLSa	Behavior Classification	Slashes manual labeling time; delivers > 97 % classification accuracy age- & sex-specific hyper-locomotion in 5xFAD Alzheimer mice	1. DeepLabCut 2. LSTM	Againste MoSeq	Webcam C900 NULAXY	*Not Mentioned*	25 fps	*Not Mentioned*	DeepLabCut PCA + UMAP LSTM	ResNet50 LSTM with 200 hidden units	C57BL/6J 5xFAD	total: 10 nose, head, ears, neck, back1, back2, tail base, mid-tail, tail tip	38,202 frame in 19 video	LSTM: 60 epochs DeepLabCut: 410,000 iterations	1. ROC-AUC per syllable 2. overall evaluation accuracy, 3. per-syllable frame counts	DeepLabCut test error 1.84 px.	LSTM evaluation accuracy 97.9 %; most syllables AUC > 0.95	SaLSa matched kpms overall but avoided grooming misclassification; kpms split 15 sub-syllables, grooming collapsed into a sub-threshold bin.
Temporal Semi-supervision method	2023	Improved 3D Markerless Mouse Pose Estimation Using Temporal Semi-supervision	International Journal of Computer Vision	https://github.com/tqxli/dannce-pytorch	3D Pose-Estimation	3D animal pose estimation with temporal semi-supervised learning	1. 3D UNet volumetric CNN; 2. Soft-argmax for heatmap regression; 3. 2D UNet for centroid triangulation; 4. Adam optimizer	Benchmarked against baseline DANNCE, DLC, SimpleBaseline, Learnable Triangulation, and temporal-convolution methods	Six synchronized color cameras	1152x1024	*Not Mentioned*	*Not Mentioned*	3D U-Net encoder–decoder with skip connections	3D U-Net	Mouse	22 body keypoints (20 evaluated in experiments)	6.7 million video frames (310 annotated 3D poses; 1,860 annotated 2D frames)	*Not Specified*	Mean per-joint position error (MPJPE); mean per-joint temporal deviation (MPJTD); body-segment length consistency metrics	MPJPE 4.14 mm at 100% labels (vs. 4.36 mm baseline); 8.17 mm at 5% labels (36.5% improvement)	Did not performed test	Temporal + extra model achieved lowest MPJPE across annotation regimes (8.17 → 6.69 → 5.04 → 4.14 mm), outperforming all baselines
A-SOiD	2024	A-SOiD, an active-learning platform for expert-guided, data-efficient discovery of behavior	Nature Methods	https://github.com/YttriLab/A-SOID	Behavior Classification	Iterative active-learning to blend supervised and unsupervised strengths	1. game-theoretic cluster definition 2. directed unsupervised clustering 3. active-learning loop	Against supervised and unsupervised methods	*Not Mentioned*	*Not Mentioned*	*Not Mentioned*	*Not Mentioned*	*Not Mentioned*		Socially interacting mice (CalMS21 dataset)	Socially interacting mice (CalMS21 dataset)	15,866 labeled frames	Iterative active learning over ~20 classifier iterations and 20 cross-validation runs	Macro average F1 score; Mean Average Precision (MAP)	Did not performed test	Macro F1: 0.874 ± 0.002; MAP: 0.918 ± 0.001	8-fold reduction in annotations: used 1,866 vs 15,866 originally, achieving on-par performance with a full-data classifier
ARBEL	2024	ARBEL: A Machine Learning Tool with Light-Based Image Analysis for Automatic Classification of 3D Pain Behaviors	bioRxiv preprint *Not Published*	*Not Mentioned*	Behavior Prediction	To detect behaviour like licking, biting, flinching, groom	1. DeepLabCut 2. XGBoost 3. SHAP	*Not Mentioned*	Basler acA2000	500x500	25hz	1. AMD Ryzen Threadripper 3970x 2. 128 GB RAM 3. NVIDIA RTX 3060 GPU	DeepLabCut based Custom feature extractor XGBoost classifier	ResNet Gradient boosted tree	C57BL/6J TRPV1-Cre mice	Total: 9 snout, neck, frontpaws, hindpaws, center, tail base, tail tip	Training: 20 video Validation: 4 video	Supervised: Until 8000 positively labeled frames.	1. Behaviour Detection F-1 score	Refered to another paper Did not performed test.	Optimal threshold yielded F-1 score: 1. Flinching: 0.81 (recall 0.82; precision 0.80) 2. Licking/Biting: 0.91 (recall 0.92; precision 0.90) 3. Grooming: 0.82 (recall 0.93; precision 0.72)	Comparission between 2D and 3D-only 2D-only test F-1 score: 0.66-0.72 3D-only test F-1 score: 0.69-0.70
FABEL	2024	FABEL: Forecasting Animal Behavioral Events with Deep Learning-Based Computer Vision	bioRxiv preprint *Not Published*	*Not Mentioned*	Behavior Prediction	Using Pose based feature to predict behavior	1. SLEAP 2. LSTM 3. Temporal Fusion Transformer 4. Random Forest	Against LSTM; TFT; Random Forest	*Not Mentioned*	320x240	30 fps	1. NVIDIA V100 GPU	SLEAP LSTM TFT Random Forest	ResNet LSTM Recurrent Network Temporal Fusion Transformer Random Forest Ensemble	Mice *Not Specified*	Total: 4 snout, ears, mid back	around 100 not specified	500 epochs	1. Average Precision on single and transition frames at different lengths	Did not performed test	Best TFT results (Average Precision): • 0.1 s single-frame: 97.70 % • 0.1 s transition: 54.16 % • 1 s single-frame: 78.30 % • 1 s transition: 27.24 % • 2 s single-frame: 63.32 % • 2 s transition: 18.57 % • 5 s single-frame: 44.97 % • 5 s transition: 15.78 %	Single‐frame, 0.1 s buffer: LSTM achieved 83.64 % AP, Random Forest 90.68 %, and TFT 97.70 %. Transition, 0.1 s buffer: LSTM 8.85 % AP, RF 19.41 %, TFT 54.16 %. Single‐frame, 1 s buffer: LSTM 77.45 %, RF 40.03 %, TFT 78.30 %. Transition, 1 s buffer: LSTM 22.23 %, RF 16.89 %, TFT 27.24 %. Single‐frame, 2 s buffer: LSTM 60.67 %, RF 23.65 %, TFT 63.32 %. Transition, 2 s buffer: LSTM 20.13 %, RF 7.93…
Keypoint-MoSeq	2024	Keypoint-MoSeq: parsing behavior by linking point tracking to pose dynamics	Nature Methods	www.moseq4all.org	Behavior Classification	Reveal modular, sub-second structure of behavior directly from keypoint streams; generalize MoSeq’s depth-based syllables to keypoint data; remove jitter-induced artifacts; apply across species and timescales.	1. DeepLabCut 2. SLEAP 3.SLDS 4. LOMO-PV	Against B-SOiD, MotionMapper, VAME	Basler ace acA1300 Monochrome Microsoft Azure Kinect	512x512 192x192	30hz 120hz	*Not Mentioned*	SLDS	SDLS HDP-HMM	C57BL/6J mice (2D Dataset) Sprague–Dawley rats (3D motion-capture)	Total: 32 Left ear Right ear Dorsal midline – Tail base, spine, Thoracic spine, Dorsal midline, Nose, Left forepaw tip, Right forepaw tip, Left hind paw tip, Left hind paw base, Right hind paw tip, Right hind paw base, Tail base, Genitals, Abdomen, nose Side-view cameras (14 points):	Mouse open field: 200 min video Rat 3D data: 5 h video	500 iteration per run total 20 runs	1. Change-score alignment to depth transitions 2. Syllable duration distributions 3. Normalized mutual information with manual labels 4. Neural (dLight) alignment magnitude & asymmetry 5. IMU jerk & angular velocity peaks 6. Motif–respiration coupling.	RSME for Train: 1. HRNet: 2.9 px 2. DeepLabCut: 3.4 px 3. SLEAP: 3.5 px RSME for Test: 1. HRNet: 3.9 px 2. DeepLabCut: 3.8 px 3. SLEAP: 4.7 px	Change-score cross-correlation: Keypoint-MoSeq: 0.4 NMI with manual labels open‐field mouse data: Keypoint‐MoSeq NMI ≈ 0.60	Transition alignment: Keypoint‐MoSeq’s syllable onsets align with depth‐MoSeq transitions with a cross‐correlation peak of 0.40, versus < 0.10 for all comparator algorithms (P = 2 × 10⁻⁷) . Syllable durations: The median Keypoint‐MoSeq syllable lasts ≈ 400 ms, compared to 33–100 ms for B-SOiD, VAME, and MotionMapper, reflecting its ability to capture behaviorally meaningful timescales . NMI with …
Lightning Pose	2024	Lightning Pose: improved animal pose estimation via semi-supervised learning, Bayesian ensembling, and cloud-native open-source tools	Nature Methods	https://github.com/Lightning-Universe/Pose-app	Core Pose-Estimation	Reduce labels needed while cutting outlier frames in half. Provide smoother, more reliable trajectories that correlate better with neural data (pupil & paw examples). Cloud app + SDK for rapid model prototyping	1. Temporal Context Network (TCN) 2. Spatio-temporal unsupervised losses - temporal-continuity, multi-view-consistency 3. Deep-ensemble + Ensemble Kalman Smoother for Bayesian post-processing	Against DeepLabCut	*Not Mentioned*	406x396	250hz 60hz 150hz	*Not Mentioned*	TCN	ResNet50	C57BL/6J	17 per frame for Mirror-mouse (7 visible body parts in two mirrors + 3 obstacle markers)	75 Labeled frame 631 extra frames 20 unlabelled video	*Not Specified* until validation loss is plateaues	1. Out-of-distribution (OOD) pixel RMSE; 2. spatio-temporal loss violations; 3. CCA correlations; 4. trial-consistency; 5. neural-decoding R²	Mirror-mouse, scarce-label OOD error: baseline supervised = 10.0 ± 0.03 px LP (semi-supervised + TCN) = 8.8 ± 0.2 px (12 % down) LP + EKS lowers error further	Not a classifier; instead shows improved behavioural signal quality: Paw CCA correlation: DLC 0.83 ± 0.02 → LP 0.86 ± 0.02 → LP + EKS 1.00 (by construction) Trial-consistency (pupil): 0.34 ± 0.05 → 0.61 ± 0.07 → 0.73 ± 0.08	correlation DLC 0.36 ± 0.03 vs LP 0.88 ± 0.01; LP + EKS = 1.0 by construction
STCS	2024	Segmentation tracking and clustering system enables accurate multi-animal tracking of social behaviors	Patterns	https://github.com/tctco/STCS	Real-time Tracking Multi-Animal Tracking	Bridges long-term ID-stable tracking and interpretable social-behaviour phenotyping; deploys from a single laptop via Docker/web UI; reveals stress-linked motor deficits in Shank3 ASD mice	1. RCNN 2. YOLOv8 3. LiteFlowNetV2 4. OSNet Re-ID 5. Socail-STGCN	Against OCSORT, BoTSORT, idTracker.ai, DLC, SLEAP, AlphaTracker2	Smartisan OD103 iPhone 13 Plus iPhone 13 S-YUE Webcam Noldus Camera	608 × 864 px → 1222 × 1072 px (dataset range)	15 – 60 Hz (typical 30 Hz)	1. Lenovo Thinkbook 16p 2021 2. AMD Ryzen 5800H 3. 16 GB RAM 4. NVIDIA RTX 3060 Max-Q	YOLOv8 OSNet Re-ID Socail-STGCN	RTMDet-tiny-Ins & Mask Scoring RCNN for seg; YOLOv8-s Pose or MobileNetV2 for pose; OSNet for re-ID; Social-STGCN for behaviour	C57BL/6 wt and Shank3 HE/HO	Total: 8 nose, ears, hind limbs, tail base, tail mid, tail tip	574 mouse images	*not specified*	1. for tracking; IDF1 / IDP / IDR, MOTA, HOTA 2. for behaviour: segCluster macro accuracy, silhouette score	Test aMP: 1. Config 1: 68.5 2. Config 2: 90.9 Val aMP: 1. Config 1: 69.7 2. Config 2: 89.0	segCluster macro-accuracy 0.59; F1 0.55	IDF1 performance (STCS vs best baseline) 43PD: 96.8 % vs OCSORT 18.8 % Noldus: 92.1 % vs OCSORT 37.2 % 63WT: 99.1 % vs OCSORT 58.6 % 23WT: 92.3 % vs OCSORT 11.9 % 43WT: 97.1 % vs OCSORT 15.8 %
STPoseNet	2024	STPoseNet: A real-time spatiotemporal network model for robust mouse pose estimation	iScience	https://github.com/Ivrgb777/STPoseNet	Real-time Tracking Core Pose-Estimation	Beats YOLOv8, DeepLabCut, and SLEAP on accuracy in both bright open-field and dim water-maze videos while still running 25 – 30 FPS on a laptop	1. YOLOv8 2. Tracking Cropping Module 3. Kalman filter	Against YOLOv8; DeepLabCut; SLEAP	Webcam	1280x1024	25 fps 30 fps 40 fps 80 fps	1. Intel i7-11800H, 2. 32 GB RAM, 3. NVIDIA RTX 3080 GPU	YOLOv8 encoder/decoder	CSPDarkNet + C2f	Swiss Webster C57BL/6J	total: 3 nose neck tailbase total 11: nose, neck, ear L/R, fore-paw L/R, tail-base, hind-paw L/R, tail-mid, tail-tip	1 647 images (3-kp OF) • 300 images (11-kp OF) • 1 392 images (3-kp WM	Loss plateau within ≤ 200 epochs for each dataset	1. Sum distance error (px); 2. % frames < 8 % body-length error; 3. RMSE; 4, head/body angle error (< 10° hit-rate); 5. processing FPS	Sum distance error: 20.83 px (open-field 3-kp) 7.15 px (water-maze 3-kp)	Did not performed test	% frames < 8 % body-length error Open-field: 100 % (nose) / 100 % (neck) / 95.0 % (tail) vs DLC 78/45/78 %, SLEAP 90/62/99 % Water-maze: 90.2/89.4/85.2 % vs DLC 68/57.6/66.4 %, SLEAP 90.6/84.4/91.6 %
SuperAnimal	2024	SuperAnimal pretrained pose estimation models for behavioral analysis	Nature Communications	https://modelzoo.deeplabcut.org	Infrasturcture/Framework	Zero-shot mAP ≥ 0.95 on held-out mouse benchmarks	1. DeepLabCut	*Not Mentioned*	*Not Mentioned*	*Not Mentioned*	40 fps	*Not Mentioned*	DeepLabCut	HRNet-W32 (top-down), DLCRNet-50 (bottom-up ResNet-50), AnimalTokenPose (ViT-Base) plus YOLO-style detectors for top-down cropping	Mice and Rat *Not Specified*	TopViewMouse 27 pts (nose, ears, paws, spine, tail…) • Quadruped 18 – 20 pts (nose, eyes, withers, hips, knees, paws/hooves, tail)	13 top-view mouse datasets (C57BL/6J, Swiss Webster, etc.) TopViewMouse-5K ≈ 5 000 images (from 13 labs) • Quadruped-80K ≈ 80 000 images (wild & lab)	750k iterations	1. mAP, 2. RMSE (px), 3. normalized error, 4. data-efficiency factor, 5. inference FPS, 6. jitter reduction after video adaptation	Zero-shot mice – DLC-Openfield mAP 95.2, RMSE 4.9 px; TriMouse mAP 76.1, RMSE 9.0 px	Did not performed test	DLC-Openfield: zero-shot mAP 95.2 vs ImageNet transfer 62.2 (1 % data) / 99.2 (full) TriMouse: zero-shot 76.1 vs ImageNet 26.1 (1 % data) / 97.7 (full) Horse-10: zero-shot NE 0.228 vs AP-10K-pretrained 0.287, ImageNet 0.296 AP-10K fine-tune: mAP 80.1 beats ViTPose-S++ (80.4 mAP with 10× larger model & 4× more data)
REVEALS	2024	REVEALS: An Open Source Multi Camera GUI For Rodent Behavior Acquisition	Cerebral Cortex	https://github.com/CruzMartinLab/REVEALS	Infrasturcture/Framework Real-time Tracking	Streamlined recording and time-stamping of one to many USB3 FLIR cameras for downstream pose-estimation analyses	Python GUI (PyQt) + FLIR Spinnaker SDK; DeepLabCut/MoSeq compatibility	Recording at 15, 30, 45, 60 FPS: frame-drop rates and inter-camera lag measured	USB3 FLIR machine-vision cameras	750x1050	15, 30, 45, 60 FPS	Intel Core i7-7700 @ 3.6 GHz (4-core), 32 GB RAM, 512 GB NVMe SSD, USB 3.0 ports	DeepLabCut Python (PyQt5) multi-threaded GUI controlling FLIR cameras	FLIR Spinnaker SDK for camera control; Python standard libraries for file I/O	C57BL/6J and CD-1 mice (6–12 wk)	10 body landmarks (snout, nose bridge, head, ears, neck, two body centroids, tail base)	*Not Specified*	*Not Specified*	1. Frame-drop rate; 2. inter-camera synchronization lag; 3. CPU/memory usage; 4. behavioral event capture concurrence across views	Refered to another paper Did not performed test.	100 % capture of object-interaction events across three angles in a 70 s trial (11/11 events detected)	Frame drops: 0.2 % at 15/30 FPS; 1 % at 45 FPS; 5 % at 60 FPS Inter-camera lag < 1 frame at all tested rates
ABNet	2024	ABNet: AI-Empowered Abnormal Action Recognition Method for Laboratory Mouse Behavior	Bioengineering	*Not Mentioned*	Behavior Prediction	Abnormal mouse behavior detection via semi-supervised learning	DeepLabCut; Enhanced ST-GCN (Gaussian noise, SE-blocks, multi-branch TCN); PCA; DBSCAN	1. Kinetics-Skeleton action-recognition benchmark In-house mouse behavior dataset (4 classes: movement, head-turn, standing, turning)	*Not Mentioned*	*Not Mentioned*	*Not Mentioned*	2.1 GHz Intel Xeon Platinum 8352V CPU; 8× NVIDIA RTX 4090 GPUs; CUDA 12.1; PyTorch 2.0;	DeepLabCut Spatio-Temporal Graph Convolutional Network (ST-GCN)	Enhanced ST-GCN with Gaussian-noise perturbed adjacency, SE channel-attention, multi-branch TCN	C57BL/6J mice	12 landmarks: nose, ears, neck, hips, tail root/mid/tip, body center	Kinetics-Skeleton: 240 k train + 20 k val clips; Mouse: ~10 h video (80/20 split)	100 epochs (SGD; data augmentation: ±3 % scale, ±5 px translation)	1. Top-1 & Top-5 classification accuracy (Kinetics); 2. Average Precision (AP) for abnormal behavior detection (mouse)	Not independently reported (relies on DeepLabCut preprocessing)	Mouse abnormal-behavior AP = 83.1 %	ABNet AP = 83.1 % vs TSC 79.5 %, GEPC 75.2 %, Conv+LSTM 75.6 %, VideoMAE 81.9 %, TAdaConvNeXtV2 81.4 %, CAST-B/16 81.1 %
Seizure Classification Pipeline	2025	Integrating manual preprocessing with automated feature extraction for improved rodent seizure classification	Epilepsy & Behavior	*Not Mentioned*	Behavior Classification	Automatic detection of seizure stages in rat in Racine scale	1. MMDetection 2. MMPose 3. MMAction2 4. Logistic Regression	Against rule-based logistic regression	*Not Mentioned*	*Not Mentioned*	30 fps	*Not Mentioned*	MMDetection MMPose MMAction2	YOLOF ViTPose PoseC3D	Spargue-Dawley Rat	Total: 17 nose, jaw, ears, neck, elbows, back, knees, heels, toes, tail parts	MMDetection: 4968 frames MMPose: 2968 frames MMAction2: 2968 frames	*Not Specified*	1. Detection Average Precision 2. Classification accuracy per stage	1. YOLOF AP: 82.2% 2. ViTPose AP: 83.37%	PoseC3D Classification Accuracy: Normal (stage 0): 75.3 % Partial (1–3): 64.7 % Forebrain (4–5): 71.3 % Brainstem (6–7): 90.3 %	Rule-based vs PoseC3D: Normal: 4.0 % vs 75.3 % Partial: 10.7 % vs 64.7 % Forebrain: 70.6 % vs 71.3 % Brainstem: 85.7 % vs 90.3 %
