# Supplementary material for: Does advancement in marker-less pose-estimation mean more quality research? A systematic review
Source: Front Behav Neurosci. 2025 Aug 22;19:1663089. doi: 10.3389/fnbeh.2025.1663089 (PMC12411509; doi:10.3389/fnbeh.2025.1663089)
Supplement: Supplementary file 3 [file Table_2.xlsx]

## Sheet: Sheet1
Article Information							Material and methods information														Performance
Name of Method	Condition	Behavior Test	Year	Title	Journal	Github	Animal	Genotype	Drug	Tool used	Apparatus	Camera	Resolution	FPS	Keypoints num	Training dataset size	Training iterations	Parameter of interest	Algorithm	Statistical methods	Tools Accuracy	Parameter Accuracy	Algorithm Accuracy	Method Accuracy
DLCAnalyzer	No Disease	Open-Field; Elevated Plus Maze; Forced Swim Test	2020	Deep learning–based behavioral analysis reaches human accuracy and is capable of outperforming commercial solutions	Neuropsychopharmacology	https://github.com/ETHZ-INS/DLCAnalyzer	C25BL/6J	Wild-Type	Yohimbine	DeepLabCut EthoVision XT14 TSE-Multiconditioning System	Open Field Chamber Elevated Plus Maze Force Swim Test	Machine Vision Camera from EthoVision TSE System	928x576	25	13	10-20 frames per test	250,000-1,030,000	Pearson’s correlation between automated and human/commercial scoring for: Distance traveled (OFT) Time in center (OFT) Time in open/closed arms (EPM) Floating duration (FST) Head-dip count (EPM) Rearing events (OFT)	2 layer ANN (256-128 neuron)	Unpaired two-tailed t-tests; One-way ANOVA + Tukey’s post-hoc; Pearson’s r; Coefficient of variation	OFT distance vs EthoVision: r = 0.99 OFT time in center: r = 0.98 EPM open-arm time: r = 0.98 EPM closed-arm time: r = 0.99 FST floating vs human: r ≈ 0.98 Head-dip count vs manual: r = 0.92 Rearing detection consistency: 86 ± 3 % frame-to-frame	Distance (OFT): r = 0.99 vs EthoVision Center time (OFT): r = 0.98 Open-arm time (EPM): r = 0.98 Closed-arm time (EPM): r = 0.99 Floating (FST): r ≈ 0.98 vs human/EthoVision Head dips (EPM): r = 0.92 vs manual; EthoVision r = 0.82 Rearing (OFT): CV ≈ 16–19 % (supported) & 42–50 % (unsupported) matching human variability	ANN classifier frame-to-frame accuracy: 86 ± 3 % (cross-validated on 20 videos) Floating classifier correlation vs human: r = 0.97 (EthoVision: r = 0.95)	Overall behavioral classification vs human gold standard: r ≈ 0.99; outperforms EthoVision and TSE on complex behaviors (head dips, rearing) with no significant differences vs human raters (one-way ANOVA, p < 0.0001); reduces intra-rater variability
*Not Specified*	Ataxia-related motor impairments	Cage Exploration Rodent Beam Walk	2020	Detecting and quantifying ataxia-related motor impairments in rodents using markerless motion tracking with deep neural networks	IEEE Engineering in Medicine and Biology Society (EMBC)	*Not Mentioned*	C57BL/6J	Wild-Type rats X-linked tremor/ataxia shaker rat mutant Wild-Type mice SCA3 mice	*None*	DeepLabCut	HomeCage Rodent Beam Walk Setup	Unspecified lab camera Panasonic Lumix Z91	*Not Mentioned*	30	Experiment 1: 5 Experiment 2: 5	Experiment 1: 80 frames (76 train / 4 test) Experiment 2: 44 frames (41 train / 3 test)	22 000 (stopped at lowest loss)	Experiment 1: tremor frequency (FFT of no-step intervals) Experiment 2: belly & tail posture, paw-fall detection, gait rhythmicity (RoG via THD)	DeepLabCut ResNet-50 Outlier-frame retraining workflow FFT & Hanning window Total Harmonic Distortion	Experiment 1: none (qualitative FFT comparison to force-plate frequency) Experiment 2: one-way ANOVA on RoG (p=0.0099 & p=0.025, η²>0.75)	Experiment 1: refined model train error 3.82 px; test error 7.41 px Experiment 2: final train error 2.20 px; test error 4.40 px	Experiment 1: tremor peak at 4–5 Hz matches published force-plate data Experiment 2: belly & tail-tip posture trajectories separate WT vs SCA3 posture	No significant difference in error after auto vs manual retraining (t(48)=0.35, p=0.73)	Recapitulated shaker rat tremor frequency without force plate Detected gait rhythmicity deficits in 3 mo SCA3 mice (RoG 0.61 vs WT 1.51) before visible slips
*Not Specified*	Spinal Cord Injury	Treadmil walking	2021	Markerless analysis of hindlimb kinematics in spinal cord-injured mice through deep learning	Neuroscience Research	*Not Mentioned*	C57BL/6J	Wild-Type	*None*	DeepLabCut MATLAB PCA	Plexiglas treadmill enclosure	GoPro Hero 7	1280x960	240	6	1000 frames	300000	30 gait kinematic parameters: cycle/swing duration, stride/step length & height, MTP velocity/orientation, joint angles & amplitudes, etc	Pose estimation: DeepLabCut (pretrained MobileNetV2/ResNet) Trajectory processing: interpolation + Savitzky–Golay smoothing Dimensionality reduction: PCA on computed parameters	Shapiro–Wilk normality; two-way mixed ANOVA + Bonferroni; Welch’s t-tests; PCA with factor loading analysis; correlations with spared tissue	Mean test error: intact mice 3.43 ± 0.04 px; SCI mice 3.95 ± 0.07 px (human variability 3.15 px)	Combined datasets (200 frames each) yielded RMSE 3.60 ± 1.58 px across joints; knee RMSE 5.9 ± 0.08 px intact, 6.5 ± 0.17 px SCI (manual ~5.79 px)	Steady decrease in RMSE until 300k iterations; similar errors for models trained on 200/400/800 frames; combined dataset sufficed to predict SCI joints at human-level accuracy	Parameters such as step height and maximal hip amplitude robustly distinguished intact vs SCI (PC1 loading cluster); pipeline captured key gait deficits not seen with BMS
PS-VAE	No Disease	Head-fixed wheel-turning decision task Open-field locomotion Passive visual stimulus viewing (face/eye, whisker movement) Head-fixed lever & lick-spout interactions	2021	Partitioning variability in animal behavioral videos using semi-supervised variational autoencoders	PLOS Computational Biology	https://github.com/themattinthehatt/behavenet	C57BL/6J	Wild-Type	*None*	Convolutional encoder/decoder VAE framework Discriminative network	IBL head-fixed rig with wheel Open-field arena Head-fixed face imaging rig with drifting grating display Two-view camera rig capturing lever & lick-spout apparatus	High-speed machine-vision cameras Point Grey, Logitech HD webcams, GoPro	open field 1280×1024 face 1920×1080	25–240	4 to 10	Variety of videos: head-fixed (4 sessions, ~10 k frames each), open-field (~90 k frames), face (single session, ~10 k frames), two-view (~20 k frames)	VAE encoder/decoder trained until convergence (~100 k–150 k iterations for each submodel); hyperparameter‐search automated on NeuroCAAS	Reconstruction of supervised pose coordinates Discovery of unsupervised dimensions Interpretability for downstream behavior/neural analyses	Encoder: convolutional neural network Supervised latents label decoder D Unsupervised latent Decoder for frame reconstruction Orthogonality penalty	R² for label reconstruction vs VAE baseline Post-hoc linear & nonlinear regression on latents Latent traversals for qualitative disentanglement ARHMM for movement detection Neural decoding (MLP) and VAE decoder retraining for frame reconstruction	Label reconstruction R²: PS-VAE supervised latents 0.68–0.93 across datasets vs VAE latents 0.27–0.59	Unsupervised latent features correlate with hand-engineered signals (jaw r≈0.76; whisker pad r≈0.51; chest r≈0.41)	Post-hoc decoding: supervised latents from neural data R² ~0.3–0.6; single VAE latent entangled across behaviors	Overall PS-VAE representation disentangles behavior into interpretable features, enables simple ARHMM detectors with >85% overlap to manual, and supports targeted neural decoding and frame reconstruction with high fidelity
*Not Specified*	Autism	Open Field Test	2022	Deep phenotyping reveals movement phenotypes in mouse neurodevelopmental models	Molecular Autism	*Not Mentioned*	C57BL/6J	WT; L7Cre; Tsc1(Purkinje cell‐specific Tsc1 KO); Cntnap2 whole-brain KO	*None*	LEAP MATLAB Wavelet transformer tSNE clustering	Open Field Arena	Point Grey 12-bit greyscale camera	1280x1024	80	18	660 frames	*Not Specified* <10% manual fixes	Multi-day spatial habituation Behavioral class occupancy over time Gait parameters: locomotion bout frequency stride phase offsets trot transition speed Grooming mode usage Wavelet‐derived posture dynamics	Pose estimation: LEAP DNN (ResNet‐based) Postural representation: pairwise distance PCA + wavelet decomposition Clustering: k-means (k=100) & tSNE embedding Compositional analysis: isometric log‐ratio + nonparametric multivariate test	Shapiro–Wilk normality; Levene’s test; Box’s M; Mauchly’s sphericity; two-way mixed & repeated-measures ANOVA + Bonferroni/Tukey post‐hoc; isometric log-ratio transformation + Wilks’ lambda-type test; Spearman correlation; Bland–Altman; percentile bootstrap (95% CI)	LEAP pose network median confidence probabilities: 0.91–0.98 for primary landmarks; snout & limb accuracy ≥ 0.91; lower confidence (0.81) for ears/body center/tail center	Spatial habituation: WT corner time increased d = 0.87–2.11, L7-Tsc1 & Cntnap2 failed to adapt (p > 0.1) Behavioral classification: human–algorithm agreement ~75–85% across 8 classes Gait phase offsets: WT trot phase ~0.5 rad; L7-Tsc1 ~1.0 rad; Cntnap2 ~0.7 rad at 0.2 m/s Grooming mode CVs matched human variability (All values within 5–10% of manual benchmarks)	Clustering reproducibility: >90% consistency between k-means and tSNE methods Stride detection: peak‐finding sensitivity >95% for all limbs PCA projection captures ~90% variance in postural distances Classification cross‐validation accuracy ~80–90% for 8 coarse classes	Overall pipeline differentiates WT vs. mutants with effect sizes d > 1.0 for key metrics (corner time, gait transition speed, grooming frequency); Spearman R ≥ 0.85 vs. manual/centroid methods; robust detection of model-specific phenotypes (forelimb lag, habituation deficits)
VAME	Alzheimer's Disease	Open Field Test	2022	Identifying behavioral structure from deep variational embeddings of animal motion	Communication Biology	LinCellularNeruoscience/VAME	C57BL/6J APP/PS1 transgenic	WT; APP/PS1 (human APP/PS1dE9) transgenic;	*None*	DeepLabCut VAME Hidden Markov Model	Open Field Arena	Point Grey 12-bit grayscale camera Basler acA2000-165umNIR	1280x1024	60	6	90000 frames	*Not Specified* VAE trained until convergence	Detection of discrete behavioral motifs and hierarchical community usage; differences in motif/community usage between tg and wt cohorts\	Variational autoencoder with bidirectional RNN encoder and dual decoders (reconstruction + prediction); HMM to segment latent embeddings into motifs; hierarchical clustering to define communities	Multiple t-tests at community/motif level with Holm–Sidak correction (α = 0.05); hierarchical clustering; motif usage ratio normalization; Spearman correlation Bland–Altman for embedding comparisons	Pose-tracking errors (DeepLabCut): training error = 2.14 px; test error = 2.51 px	Open-field metrics (speed, distance, center time) no significant genotype differences WT speed 6.12 ± 1.36 cm/s TG 6.84 ± 1.57; p > 0.05; human expert classification accuracy at chance (46.6 ± 8.4%)	Clustering reproducibility > 90% between HMM and alternative clustering; human-algorithm agreement ~ 72% of frames labeled identically by all three experts; VAME motif overlap with expert labels higher than AR-HMM and MotionMapper	VAME identified five motifs/communities with significant usage differences between APP/PS1 and WT (p ≤ 0.05), undetectable by humans; effect sizes (Cohen’s d) > 1.0 for key motifs; hierarchical community analysis revealed up- and down-regulated motif groups robustly across time blocks
*Not Specified*	Dorsolateral quadrant cervical spinal cord injury	Single Pellet Retrieval Task	2022	Markerless tracking enables distinction between strategic compensation and functional recovery after spinal cord injury	Experimental Neurology	*Not Mentioned*	Jackson Laboratories Rosa26-LSL-Cas9 knock-in mice	Rosa26-LSL-Cas9 (wild-type Cre-negative background)	*None*	DeepLabCut	Custom 3D-printed acrylic enclosure	GoPro HERO7 Black	1920 × 1080	240	10	500 frames	187,000 iterations (three-step learning rate schedule: 0–100k @0.01, 100k–148k @0.001, 148k–187k @0.001)	Pronation Index (PI): degree of wrist rotation Distance Index (DI): normalized paw-tip trajectory length	Pose estimation: DeepLabCut ResNet-101 CNN PI computed as normalized X-distance between thumb and ulnar-edge points DI computed as normalized sum of Euclidean distances of index-tip frames	One-way and repeated-measures ANOVA with Tukey’s HSD; Pearson correlation; coefficient of variation (CV)	Final DeepLabCut model training error = 2.34 px; test error = 2.35 px (< 5 px target)	DLQ lesion group: PI dropped from 77% to 58% (p < .001) DI increased from 24% to 59% (p < .001) Sham controls showed no significant PI or DI change (p > .05)	240 FPS model achieved testing error = 3.67 px (~20% of digit width), generalizing across frames and attempts	PI and DI metrics reliably distinguished DLQ vs. sham recovery patterns independent of retrieval success; PI exhibited lower variability (CV = 33.9%) than Retrieval Index (CV = 47.0%), demonstrating robust kinematic outcome measures
*Not Specified*	No Disease	Open Field Test	2022	Stride-level analysis of mouse open-field behavior using deep-learning-based pose estimation	Cell Reports	https://github.com/KumarLabJax/gaitanalysis	Laboratory mice (62 common inbred strains)	Wild-Type	*None*	HRNet-W32 CNN	Open Field Arena	Top-down grayscale machine-vision camera recordin	480 × 480	30	10	8910 frames	600 epochs	Gait: stride speed, step length, stride length, step width, limb duty factor, temporal symmetry Posture: lateral displacement and phase offset of nose, tail base, tail tip Turning: angular velocity of body axis	HRNet-W32 for heatmap-based keypoint detection Argmax heatmap inference (x,y) coordinates Spatial/temporal metric calculation per Hildebrand conventions Cubic‐spline interpolation for lateral displacement phase analysis	Descriptive and binned analyses of gait metrics, Hildebrand‐style plots, circular statistics for phase metrics; stringent filtering of strides by confidence (>0.3) physiological plausibility (body speed ≥10 cm/s)	Keypoint confidence scores typically >0.8 for visible landmarks; occluded forepaws excluded due to lower confidence (<0.3)	Recovery of expected gait relationships: stance percentage decreases with increasing stride speed; duty factor vs. speed trends consistent across five strains	Robust stride detection: clean high-amplitude hind-paw oscillations, consistent foot-strike detection across ≈15 000 strides per strain; reliable lateral posture phase extraction	Enables high-throughput, unforced free-movement gait phenotyping with sensitivity to detect known strain- and mutant-specific gait/posture differences; adaptable to archival open-field video; validated across 62 genetically diverse strains
*Not Specified*	No Disease	Rodent Beam Walk	2023	An integrated workflow for 2D and 3D posture analysis during vestibular system testing in mice	Frontiers in Neurology	*Not Mentioned*	C57BL/6J Mice	WT PC::G5-tdT Gad2::Cre	*None*	FluoRender DeepLabCut	Rodent Beam Walk Setup	iPhone 7	1280x720 1920x1080	30	18	20 video in 4 Camera setup; each model trained on 23-31 frames	300000	Standard Walk Cycle Velocity Stops Leg coordination Event detection	FluoRender Scripts	One way ANOVA two tailed t-tests p-value threasholds	*Not Mentioned*	Velocity: 15-22cm/s Supported Legs patterns 2-3-3	Standard Walk Cycle matched to walk cycle by correlation	*Not Specified* But the workflow successfully detected events like slips, jumps, stalls, and compensatory tail movements; improved detection vs. velocity alone
AMBER	No Disease	Maternal behavior observation	2023	Automated maternal behavior during early life in rodents (AMBER) pipeline	Scientific Reports	https://github.com/lapphe/AMBER-pipeline	Long Evans Rat	Wild-Type	*None*	DeepLabCut SimBA BORIS SHAP	HomeCage with Camera	Raspberry Pi Camera	1280x780 920x550	30	Dam: 32 Pup: 9	Dam: 4710 frames from 255 videos Pup: 1712 frames from 238 videos	Dam: 650,000 Pup: 200,000	7 Maternal behavior: Nest attendance nursing grooming licking self-grooming eating drinking	SimBA Random Forest Classifier	Linear Mixed modules SHAP Permutation feature importance	DeepLabCut: Dam Test error: 14.39px Pup Test error: 11.81px filtered at likelihood: >0.5	Behavior durations tracked Nest 39.3% Grooming 10.1% Nursing 21.6% Eating 9.5% Drinking 7.0%, Grooming 16.9%	Behavior classifier F1 scores on test set: all ≥ 0.886; hold-out set F1: Nest (0.990), Active nursing (0.828), Lick/Groom (0.766), Eating/Drinking (0.534–0.550)	Frame-level accuracy for 7 behaviors over P1–P10; valid across different dams and pup ages (P0–P10); generalizable with caveats
*Not Specified*	Alzheimer's Disease	Open Field Test	2023	Video-based marker-free tracking and multi-scale analysis of mouse locomotor activity and behavioral aspects in an open field arena: A perspective approach to the quantification of complex gait disturbances associated with Alzheimer's disease	Frontiers in Neuroinformatics	*Not Mentioned*	C57BL/6J Double-transgenic Mo/HuAPP695swe + PS1-dE9	WT; APP/PS1dE9 transgenic;	*None*	DeepLabCut DPCCA (detrended partial cross-correlation analysis)	Open Field Arena	Sony IMX766 sensor camera	1280 × 720	30	7	50-100 frames	*Not Specified* training until convergence	Fluctuation exponents Detrended cross- and partial-correlation coefficients Inter-part coupling strength & delays	–Pose estimation via ResNet-50 CNN (DeepLabCut) DPCCA: detrended partial cross-correlation Network graph reconstruction of body-part interactions	Tukey-fence outlier removal Mann–Whitney U-tests for group comparisons at each scale (α = 0.05)	Tracking pipeline produced <10–20% missing frames, mitigated by median filtering; overall marker detection likelihood >0.9	Significant shifts in crossover scale between AD vs. controls: X-axis: p = 2.4×10⁻⁷ Y-axis: p = 4.8×10⁻⁹ Cross-correlation discrepancies at s ≈ 5–10 s: Specific R: p = 1.4×10⁻⁷ Unspecific R: p = 2×10⁻¹⁰	Partial correlations eliminated spurious large-scale co-movement effects, revealing intrinsic body-part coupling (>90% reproducibility across animals)	Pipeline robustly detected AD-related gait alterations unobservable by standard metrics; reconstructed network graphs showed shorter inter-part delays in AD mice, supporting higher gait variability diagnosis
SEB3R	No Disease	Open Field Test	2023	Automated Segmentation of the Mouse Body Language to Study Stimulus-Evoked Emotional Behaviors	eNeuro	gchelini87/SEB3R	C57BL/6J	Wild-Type	*None*	DeepLabCut MATLAB	Open Field Arena	Two synchronized monochrome USB3 cameras	1280x1024	25	6	*Not Mentioned*	*Not Specified* training until convergence	Unsupervised postural clusters (“Behavioral Modules”) identified frame-by-frame; subsecond posture dynamics; stimulus-evoked changes in BM expression	per-mouse k-means on inter-hotspot 3D distances posture clusters group-level k-means on averaged posture centroids Behavioral Modules (BM)	k-means clustering with Elbow method (kmean_opt) Friedman test + Wilcoxon post-hoc for repeated measure Mann–Whitney + Steel–Dwass for between-group comparisons Pearson correlations with manual scoring ARC immunofluorescence correlations (Pearson’s r)	DeepLabCut-3D tracking: per-landmark error ≈ < 3 px; clustering reproducibility across subjects high; BM count consistent between sexes	Manual vs automated behavior correlations: fear BMs vs active/passive avoidance r ≈ 0.36–0.42; exploration BMs vs rearing r ≈ 0.92; short-bout (< 120 ms) detection error < 12 %	Frame-by-frame BM assignment accurate to within individual posture variability; median BM sequence length ≈ 3 frames (120 ms) with reliable detection down to 40 ms resolution	SEB3R discriminates neutral vs stimulus-evoked behavior: significant BM expression changes in WN but not OF; BM8 expression correlates with BLA Arc expression (r = 0.81, p = 0.001) indicating biological relevance
Two‐Bottle Choice Assay	Overnight‐fasted	Two‐bottle choice licking assay in fasted vs. sated mice	2023	Evaluation of mouse behavioral responses to nutritive versus nonnutritive sugar using a deep learning‐based 3D real‐time poseestimation system	Journal of Neurogenetics	*Not Mentioned*	C57BL/6J	Wild-Type	*None*	AVATAR multi‐vision 3D pose system MATLAB Classification Learner	Custom two‐bottle choice chamber	Four side‐view + one bottom‐view machine‐vision cameras	3600x2000	30	9	20 frames for Posenet; 307 labeled “pre‐lick” sequences for classifier training	20 frames × 3D‐reconstruction epochs; classifiers via cross‐validation (10‐fold)	Lick metrics: total licks, lick‐bout count/duration, inter‐bout interval; Classification accuracy of sucrose vs. sucralose approach; t‐SNE cluster separability over time	Posenet Classifiers: Naive Bayes, Gaussian‐kernel SVM, logistic regression Dimensionality reduction: t‐SNE, k‐means, UPGMA hierarchical clustering	Two‐tailed t‐tests (lick metrics); repeated‐measures ANOVA (time bins); classifier cross‐validation accuracy; ROC/AUC; χ² for cluster proportions	≥ 95 % correct detection of 9 keypoints	Lick‐bout classifier (early): Naive Bayes 75.7 %, SVM 81.2 % vs. 50 % chance	Gaussian SVM ROC AUC = 0.84	SVM classification improves from 69.4 % (0–10 min) to 81.2 % (20–30 min); clear t‐SNE cluster separation (p < 0.001 by silhouette)
*Not Specified*	No Disease	Overground runway gait Treadmill locomotion	2023	A Multimode Markerless Gait Motion Analysis System Based on Lightweight Pose-estimation Networks	Bioengineering	*Not Mentioned*	C57BL/6J	Wild-Type	*None*	LitePose	Plexiglas treadmill	Basler acA1920-155um (monochrome)	1920x1080	100	12	5000 frames (80/20 train/test split)	200 000 iterations (Adam optimizer, LR 1e-3)	Stance duration; swing duration; gait cycle time Joint angles (hip, knee, ankle) mean/max/min Toe trajectory height (mean, peak, variance)	LitePose: MobileNetV2 + heatmap regression; OpenPose CPPE	Repeated-measures ANOVA (speed × side); paired t-tests for phase durations; RMSE for angle trajectories	LitePose keypoint RMSE = 2.4 px (mean) OpenPose = 3.8 px (on test set)	Stance/swing durations within 5 ms of manual labels; joint‐angle MAE = 2.1° vs manual = 1.8°	LitePose joint‐angle correlation r = 0.97 vs manual; OpenPose r = 0.93	Overall gait-cycle detection F1 = 0.95; LitePose outperforms OpenPose (F1 = 0.89) in cycle detection across speeds
Air-Stepping	No Disease	Proposed: Air Stepping in neonatal mouse	2024	Air-stepping in the neonatal mouse: a powerful tool for analyzing early stages of rhythmic limb movement development	Journal of Neurophysiology	*Not Mentioned*	C57BL/6 Mice Neonatal	Wild-Type	L-DOPA	DeepLabCut LabView MatLab ClampFit	Dual crosses cloth harness EMG	FLIR Flea3 GigE Camera	*Not Mentioned*	120	Side View: 14 Bottom-Up View: 16	Side View: 600 frames from 30 videos Bottom View: 440 frames from 22 videos	Side View: 535,000 Bottom View: 751,000	Step duration Step frequency Duty cycle Limb coordination EMG burst phasing Gait type	EMG Step-matching Circular Statistics Cross-corelation	Two way ANOVA Permutations test Bonferroni post-hoc Watson-Williams circular t-test Estimation stats with bootstrap	*Not Mentioned*	Step duration: 363-387 ms Step frequency: 2.7-2.9Hz Phasing reposrted 95% CI	Interlimb phasing consistency verified FPM autocorrelation 0.55-0.68 PTCC 1.0 No drop across age	72% of P7 and 77% of the P10 mice showed full air-stepping bouts consistent with 30-45 mins rhythmic activity post L-DOPA
*Not Specified*	Parkinson's Disease	Rodent Beam Walk	2024	Automated procedure to detect subtle motor alterations in the balance beam test in a mouse model of early Parkinson's disease	Scientific Reports	*Not Mentioned*	C57BL/6J Mice	WT Injected with AAV9 empty; AAV9-A53T-hα-syn	*None*	DeepLabCut SimBA ImageJ GraphPad Prism	Rodent Beam Walk Setup	*Not Specified*	1280x720	30	5	320 frames from 16 videos	149000	Time to cross; Walking duration; Fall count; Walking classifier; Distance covered	SimBA Random Forest Classifier	Multiple unpaired t-test Pearson correlation Significance threshold	DeepLabCut: Train error: 2.87 px Test error 3.27 px cutoff likelihood: 0.6	Walking classifier: Precision = 0.721, Recall = 0.921, F1-score = 0.809; Fall classifier threshold = 0.92	Strong discrimination between walking and non walking	Significant changes detected in walking metrics for male A53T mice not visible manually; no statistical diff between manual and automated measurements of fall, time to cross, or distance covered
*Not Specified*	Arthritis Pain	Automated Arthritis Pain Assessment	2024	Combining dual‐view fusion pose estimation and multi‐type motion feature extraction to assess arthritis pain in mice	Biomedical Signal Processing and Control	*Not Mentioned*	C57BL/6J Mice	WT undergone Hindpaw Surgery	*None*	CNN DenseNet	Behavior Observation Chamber	*Not Specified*	1920x1440	60	6 per view	8000 per view	*Not Specified* 240 min of training time	Pose estimation accuracy Pain Classification accuracy	Support Vector Machine Dual-view fusion DeseNet	Unpaired t-test	Pose Estimation Vertical view AP: 0.83 Upward view AP: 0.87	Pain Classification Accuracy: 0.8 (AUC 0.95 in ablation)	SVM accuracy: 0.80 (upward+vertical) with AUC 0.95	Overall system classification accuracy: 0.80
*Not Specified*	Alcohol Intoxication and withdrawl	Three Chamber Sociablity Social Novelty Test	2024	Deep learning-based scoring method of the three-chamber social behaviour test in a mouse model of alcohol intoxication. A comparative analysis of DeepLabCut, commercial automatic tracking and manual scoring	Heliyon	*Not Mentioned*	C57BL/6J	Wild-Type	Ethanol	DeepLabCut AnyMaze SimBA	clear acrylic three-chamber box divided into three chambers with perforated wire cages; interaction around cage, proximity zone	Logitech C615 HD Webcam	*Not Mentioned*	30	8	100 frames from 10 videos	140000	Sociability preference index Social novelty preference index Time spent interacting vs proximity	Sociability preference index Social novelty preference index Time spent interacting (nose in 1 cm ROI) vs proximity (zone time)	Shapiro–Wilk test; Two-way ANOVA + Bonferroni’s multiple comparisons; Spearman correlation (95 % CI); Bland–Altman analysis; α = 0.05	DLC pose estimation errors: train error = 2.44 px; test error = 3.31 px (P-cutoff = 0.6) Interaction classification by SimBA matches manual scoring with R = 0.982	DLC detected significant social deficits in female mice during acute withdrawal (p = 0.006 sociability; p = 0.015 novelty) matching manual scores AnyMaze failed to detect these deficits (ns) DLC vs manual exhibited lower bias and tighter agreement than AnyMaze Both methods agree at baseline but DLC more accurately reflects direct interaction	DLC vs manual Spearman R = 0.982 (p < 0.0001) AnyMaze vs manual R = 0.873 (p < 0.0001) DLC bias = 2.23 px, SD = 11.02; 95 % limits: −19.36 to 23.83 px AnyMaze bias = 61.31 px, SD = 53.40; 95 % limits: −43.35 to 166.0 px	Overall, DeepLabCut + SimBA pipeline correlates with manual gold standard at R = 0.982 and outperforms AnyMaze in sensitivity to social deficits, providing a low-bias, high-agreement scoring method for three-chamber tests
MoSoMoTr	No Disease	Social interaction assays	2024	Markerless Mouse Tracking for Social Experiments	eNeuro	MoSoMoTr/MoSoMoTr	C57BL/6J	WT C57BL/6J, BTBR, Crh-IRES-Cre::Ai14	Intranasal ZnSO₄	MaskR-CNN DeepLabCut	three-chamber box	Logitech C615 HD webcam	540 × 540	30	2	Auto-training set: 1,060 frames Manual-training set: 212 frames	~25 epochs	Segmentation quality (AP, AP75, AP50) Multi-object tracking accuracy Identity switches count Snout/tail-base detection PCKh (50 % head length)	Mask R-CNN MD (mask-based detection) Trajectory stitching via IoU-based overlap matching Conditional ensemble DLC/SLEAP	COCO metrics: average precision (AP, AP75, AP50) at varying IoU thresholds MOTA: combines false negatives, false positives, ID switches PCKh: head-normalized keypoint correctness Paired comparisons (e.g., identity switch reductions)	Segmentation (auto-trained model): AP = 58 %; AP75 = 80 %; AP50 = 95 % Dual-trained model (< 1 % failed frames across all videos) outperforms auto-trained in every setup	MOTA for snout/tail-base increased by ∼15 % over DLC or SLEAP alone across 12 videos Identity switches reduced by > 10× with MD + ensemble vs DLC/SLEAP	Snout/tail-base PCKh (50 % head length): MD + DLC ensemble > 90 % correct keypoints vs < 80 % for DLC alone Trajectory continuity: < 1 % identity switches per video vs > 10 % with pure deep-learning methods	Overall MaSoMoTr pipeline yields near elimination of identity switches, ∼15 % MOTA improvement, and robust snout/tail-base detection across bedding, tether, and headstage conditions without human correction
SBeA	No Disease	Free–social behaviour	2024	Multi-animal 3D social pose estimation, identification and behaviour embedding with a few-shot learning framework	Nature Machine Intelligence	*Not Mentioned*	C57BL/6J	WT C57BL/6J; Shank3B⁻/⁻ knockout	*None*	YOLACT++ VisTR (transformer-based VIS) DeepLabCut/SLEAP MouseVenue3D ResMLP + UMAP	Transparent acrylic circular open-field	Multi-view machine-vision cameras calibrated via chessboard; top-down and oblique views	1280 × 1024	25-60	15-18	400 frames	150000	3D pose reconstruction accuracy Identity recognition accuracy Clarity of unsupervised social behaviour modules	COCA data augmenter + YOLACT++ & VisTR 3D reconstruction via epipolar/geometric constraints (MouseVenue3D) Bidirectional transfer learning (EfficientNet backbone) Dynamic time alignment + parallel decomposition + ResMLP/UMAP for behaviour embedding	Two-way ANOVA with Sidak/Tukey corrections for r.m.s.e. comparisons Confusion matrix & silhouette coefficient for identity validation Cluster purity metrics for social behaviour modules	r.m.s.e. of 3D pose: ~2 px overall; <2 px on close-interaction frames (all body parts)	Identity recognition zero-shot accuracy > 90% (mean validation precision) Silhouette coefficients > 0.85 for most mice	Identity model: top-1 accuracy > 90% on unseen frames VIS segmentation AP50–AP75 > 80–95% for masks	Unsupervised social behaviour clustering purity > 0.80 across 14–405 classes Detected ASD-related phenotypes (Shank3B KO) with clear WT–KO separation in phenotype space
KineWheelSystem	No Disease	Paw placement tracking on the KineWheel	2024	KineWheel–DeepLabCut Automated Paw Annotation Using Alternating Stroboscopic UV and White Light Illumination	eNeuro	WinterLab-Berlin/KineWheelSystem	C57BL/6J	Wild-Type	*None*	DeepLabCut; custom Python script for UV‐to‐white frame annotation; KWA-Controller GUI; Arduino Nano synchronization	KineWheel transparent wheel with 45° mirror, custom harness	Basler acA720-520uc 4K HDR camcorder	720x364	720	8	150 white‐light frames (100 train / 50 test)	30 000 iterations	Euclidean distance between predicted and ground‐truth paw keypoints (pixels)	DeepLabCut UV‐frame color filtering deterministic mapping of paw positions to adjacent white‐light frames	Independent two‐sample t‐test comparing mean Euclidean distances	Mean Euclidean error (auto‐trained model): 2.6 px (SEM 0.23) manual‐trained: 2.7 px (SEM 0.17)	Subpixel consistency: SD = 0.68 px (auto model) 0.47 px (manual model), range ~1.5–4 px across test images	No significant difference between models: t(48)=0.35, p=0.73	Automated annotation yields model performance equivalent to manual labeling (Δ mean error = 0.1 px; p=0.73)
String Pulling Analysis Pipeline	No Disease	Standing string-pulling for food reward	2024	Information-theory analysis of mouse string-pulling agrees with Fitts’s Law: Increasing task difficulty engages multiple sensorimotor modalities in a dual oscillator behavior	Behavioural Brain Research	*Not Mentioned*	Thy1-GCaMP mice	Thy1-GCaMP transgenic	*None*	DeepLabCut v2.3; custom MATLAB scripts for image segmentation, Hilbert-transform cycle detection, ksdensity spatial smoothing	Transparent plexiglass string-pulling box, food reward attached to string end	Sony FDR-AX700 4K HDR camcorder	1080x1920	120	5	*Not Mentioned*	*Not Mentioned*	Pull time; reach-cycle count; misses; mouth-grasp count; hand–hand/hand–nose phase; nose travel distance; hand amplitude; hand velocity; fractal dimension; Fitts’s law ID vs time	DeepLabCut MATLAB segmentation & ksdensity Hilbert transform for cycle detection Wavelet coherence for phase analysis Box-counting fractal dimension Nonlinear regression (fitnlm) for Fitts’s law model	Repeated-measures ANOVA + Newman-Keuls; wavelet coherence significance by Monte Carlo; F-tests for Fitts’s law fits (nonlinear regression)	DLC tracking: ≥ 99 % correct detection of the five body parts (p-cutoff ≥ 0.9)	Automated reach-cycle, miss and mouth-grasp counts matched manual frame-by-frame scoring (no significant differences in left vs right hand cycles: right 1098 vs left 1131)	Wavelet coherence analysis reliably distinguished in-phase vs anti-phase hand movements (String 1 vs Strings 2–5; F(4,12)=6.33, p=0.006)	Fitts’s law model fit for each mouse (F = 16.9–28.1, p < 0.05) across mice (F = 78.2, p = 0.003), demonstrating that pull time scales with log₂(1/string thickness)
BAS	Spinocerebellar Ataxia type 6	Rodent Beam Walk	2024	Phenotypic analysis of ataxia in spinocerebellar ataxia type 6 mice using DeepLabCut	Scientific Reports	https://github.com/RUB-Behavioral-Neuroscience/Beamwalk_Analysis_Script	C57BL/6J	WT; CT-longQ27PC transgenic; SCA6⁸⁴Q knock-in	*None*	DeepLabCut custom R scripts (BAS)	Rodent Beam Walk Setup	Sony HDR-CX730E	1920x1080	50	15	1,105 frames from 45 videos	650000	Number of minor (20–50 % below beam) and major (> 50 % below beam) hind-paw slips Relative positions of paw, nose, belly, back, tail (base/center/tip) to beam top (%) Tail-base angle between nose and tail tip	Pose estimation: ResNet-50 CNN (DeepLabCut) Slip classification: thresholding + peak/valley detection (photobiology R package)	Two-tailed Mann–Whitney U-tests; Bonferroni–Holm correction for multiple comparisons; nonparametric tests due to unequal variances and non-normality	DeepLabCut network errors: train error = 6.11 px; test error = 2.77 px	Minor slips: 90 trials counted by BAS within ±1 of researcher, ~78 % accurate Major slips: 102 trials within ±1, ~89 % accurate No significant slip-count differences vs manual at 6 mo; significant increases in major slips at 18 mo in CT-longQ27PC (p = 0.04) SCA6⁸⁴Q (p = 0.0074)	BAS slip-count accuracy vs manual: overall ≈ 83 % (minor slip: ≈ 78 % within ±1; major slip: ≈ 89 % within ±1)	Detection of ataxic phenotypes: significant major slip increases and body-part position shifts at 18 mo; SCA6⁸⁴Q mice show more severe deficits vs CT-longQ27PC; continuous position and angle metrics reveal subtle ataxia not captured by manual scoring
ForestWalk	Angelman syndrome SLC6A-1 related disorder	Rodent Beam Walk	2025	Forestwalk: A Machine Learning Workflow Brings New Insights Into Posture and Balance in Rodent Beam Walking	EJN: European Journal of Neuroscience	https://github.com/Roche/neuro-forestwalk	C57BL/6J Mice	Ube3a 129 WT/KO; Ube3a B6/129 hybrid 9 WT/KO; AS-ICTerm WT/KO; GAT1 (Slc6a1) WT/KO	Diazepam	DeepLabCut SimBA	Rodent Beam Walk Setup	Basler C-mount acA1920-150um Camera	2.3MP	120	13	520 frames from 26 videos	1030000	Time to cross Foot slip count	Random Forest Classifier (RFC)	ANCOVA Wilcoxon Test Two way ANOVA	DeepLabCut: Train 3.11px error Test: 3.82px error SimBA: (Wilcoxon Test) a. Default SimBA >50% p=0.001 b. Extended SimBA < 50% p=0.05	Foot slip count: Orignal data: 0.97 (recall) 0.82 (precision) Test data: 0.92 (recall) 0.81 (precision)	Threshold based foot slip detection Recall 0.97 Precision 0.82	*Not Mentioned*
ArguelloALab	Substance use disorder	Operant Self-Administration (Cocaine IVSA)	2025	Analysis of Operant Self-administration Behaviors with Supervised Machine Learning: Protocol for Video Acquisition and Pose Estimation Analysis Using DeepLabCut and Simple Behavioral Analysis	eNeuro	https://github.com/fmaureira/ArguelloALab	Sprague Dawley Rat	Wild-Type	Cocaine	DeepLabCut SimBa Med-PC MSU HPCC Cluster	Operant Chamber	Raspberry Pi Camera GoPro Hero 8 Black	640x480 1920x1080 3840x2160	24 240	6	Network 1: 1500 frames Network 2: 417 frames Network 3: 985 frames Network 4: 1100 frames	630,000-950,000	Quardant time Orientation to liver Exploration grooming pacing liver response	SimBA Random Forest Classifier	Repeated-measures ANOVA paired t-tests Tukey's post hoc	DeepLabCut: Pixel error: <10px Accuracy 91-99.12%	ROI tracking precision: 6px/mm Classifier accuracy F1 score: >0.7	Network 4: 9.38px error; 99.12% accuracy	Detected behavior matched Liver events Quardant time and orientation reflected the operant patterns
InteBOMB	No Disease	Open-Field; Elevated Plus Maze; Forced Swim Test fisheye distortion, WFCI reward seeking, “headset” EEG/EMG, home-cage social interactions	2025	InteBOMB: Integrating generic object tracking and segmentation with pose estimation for animal behavior analysis	Zoological Research	*Not Mentioned*	C57BL/6J	Wild-Type	*None*	InteBOMB pipeline: Siamese nets + DCFs DeepLabCut/SLEAP	Transparent open-field arenas PVC plus-maze Plastic beakers for FST Fisheye panoramic rigs Calcium-imaging reward chambers EEG/EMG-equipped home cages	Point Grey 12-bit bottom-up, fisheye lenses, overhead machine-vision cameras, Logitech HD webcams	1280 × 1024 to 1920 × 1080	25–80	6 - 18 varies on dataset	200–8 000 frames	up to ~140 000 iterations	Zero-shot tracking accuracy Joint‐latent‐space behavior classification performance	Tracking: Siamese network + discriminative correlation filter Segmentation: anchor-based mask head Pose: top-down DeepLabCut/SLEAP Behavior embedding: VIT/CNN features + joint latent-space clustering	Percent-improvement benchmarks Cross-dataset generalization tests UMAP / clustering agreement metrics	Tracking and pose estimation error comparable to state-of-the-art DeepLabCut/SLEAP on each mouse dataset (≤ 3 px error)	21 % enhancement in joint latent-space behavior classification accuracy across mouse datasets	24 % improvement in zero-shot generic mouse tracking over baseline generic-tracker benchmarks	Robust, generalizable behavior analysis across six distinct mouse datasets with consistent performance; outperforms commercial tracking in diverse lab scenarios
LBWT-AT	Intracerebral Hemorrhage (ICH) Stroke	Rodent Beam Walk	2025	Ledged Beam Walking Test Automatic Tracker: Artificial intelligence-based functional evaluation in a stroke model	Computers in Biology and Medicine	*Not Mentioned*	Sprague–Dawley rats	Wild-type	*None*	DeepLabCut	Rodent Beam Walk Setup	GoPro Hero 8 Black	3840x2160	60	7	450 videos total (225 for training/testing; 225 for validation)	500000	Out-of-bounds ratio (automated) vs slip ratio (manual) as measures of motor impairment	Pose extraction: DeepLabCut (ResNet-50) Deficit metric: classification of coordinates above vs below beam threshold	Spearman correlation between automated out-of-bounds and manual slip ratios Reproducibility assessment (deterministic network outputs) Descriptive comparison across timepoints (pre-ICH vs multiple post-ICH days)	Mean Euclidean error after refinement: 16.51 px (0.37 % of coordinate range) at p_cutoff 0.5 High reproducibility: identical network outputs for same video inputs (deterministic)	Spearman ρ = 0.853–0.972 for various timepoints comparing automated out-of-bounds vs manual slip ratios (e.g., ρ = 0.940; p < 0.0001) Algorithm Accuracy • Outlier correction + retraining reduced test error to 16.51 px (mean) Network likelihood for target coordinate ≥ 0.5	Outlier correction + retraining reduced test error to 16.51 px (mean) Network likelihood for target coordinate ≥ 0.5 reliably captures hindlimb positions across 28 days	Automated LBWT-AT correlates strongly with manual scoring (ρ up to 0.972), demonstrates greater reproducibility than manual counting, sensitively tracks motor deficits over time
*Not Specified*	No Disease	Touchscreen-based rodent Continuous Performance Test (rCPT)	2025	Time-on-task–related decrements in performance in the rodent continuous performance test are not caused by physical disengagement from the task	Digital Psychiatry and Neuroscience	https://github.com/yestmd/cpt-dlc-vfa	C57BL/6J	Wild-Type	Amphetamine hemisulfate	DeepLabCut Visual Field Analysis (VFA)	Modified Bussey–Saksida touchscreen chamber with transparent acrylic wall boosters	Top-down CCTV camera	960 × 480 or 720 × 480	30 or 60	3	10–30 videos per chamber configuration; 50 frames labeled per video (10–30 videos × 50 frames) with iterative outlier relabeling	ResNet-50 networks trained to 1–4 px error (95% train/5% test splits), with retraining after outlier correction until target error achieved	Hit rate, false alarm rate, sensitivity, response bias Response rate Orientation index Time-on-task (15 min bins) vigilance decrement	Pose estimation: ResNet-50 CNN (DeepLabCut) Orientation: geometric VFA Behavioral metrics: signal-detection theory parameters and mixed‐effects modeling	Linear mixed‐effects models (lme4 in R) for training and TOT effects; two‐way ANOVA/Bonferroni post‐hoc for time × sex/dose effects; signal detection calculations for d′ and c	DLC pose estimation: train/test error 1–4 px (target); outlier filtering reduced mislabels to < 1.6 % of frames	Male mice: significant d′ decrement over time (bins 4–6; p < 0.01) without orientation loss (orientation index ~ 0.9) Response rate decreased from bin 2 onward (p < 0.001) Amphetamine (0.6 mg/kg) reduced FAR (p < 0.05) and improved d′ in males; mixed effects in females	Orientation index stable across trial types (hits, FA, misses, CR) with no time × response interaction; VFA classification validated by manual inspection of outlier frames	Combined DLC+VFA platform dissociates vigilance decrement from physical disengagement; reveals TOT-dependent performance decline driven by reduced response rate and conservative bias rather than orientation drop; amphetamine reverses male vigilance decrement without altering orientation
